# Supplementary material for: Synthesis and characterization of thermally stable energetic complexes with 3,5-diaminopyrazolone-4-oxime as a nitrogen-rich ligand
Source: Royal Society of Chemistry journal article supplement (doi:10.1039/d2ce00715k), 2022-01-01

## Supporting Information

### Synthesis and Characterization of Thermal Stable Energetic Complexes with 3,5-diaminopyrazolone-4-oxime as Nitrogen-Rich Ligand

Lu Zhang,<sup>a</sup> Wenshuai Dong,<sup>a</sup> Zujia Lu,<sup>a</sup> Tingwei Wang,<sup>a</sup> Chao Zhang,<sup>a</sup> Zunning Zhou,<sup>a</sup> and Jianguo Zhang\*<sup>a</sup>

#### Index

**Supplementary Figure 1.** Single-crystal X-ray structure of DAPO

**Supplementary Table 1.** Bond Lengths for DAPO

**Supplementary Table 2.** Bond angles for DAPO

**Supplementary Table 3.** Torsion angles for DAPO

**Supplementary Figure 2.** Single-crystal X-ray structure of  $[\text{Co}(\text{DAPO})_2(\text{H}_2\text{O})_2](\text{NO}_3)_2$

**Supplementary Table 4.** Bond Lengths for  $[\text{Co}(\text{DAPO})_2(\text{H}_2\text{O})_2](\text{NO}_3)_2$

**Supplementary Table 5.** Bond angles for  $[\text{Co}(\text{DAPO})_2(\text{H}_2\text{O})_2](\text{NO}_3)_2$

**Supplementary Table 6.** Torsion angles for  $[\text{Co}(\text{DAPO})_2(\text{H}_2\text{O})_2](\text{NO}_3)_2$

**Supplementary Figure 3.** Single-crystal X-ray structure of  $[\text{Cd}(\text{DAPO})_2(\text{H}_2\text{O})_2](\text{NO}_3)_2$

**Supplementary Table 7.** Bond Lengths for  $[\text{Cd}(\text{DAPO})_2(\text{H}_2\text{O})_2](\text{NO}_3)_2$

**Supplementary Table 8.** Bond angles for  $[\text{Cd}(\text{DAPO})_2(\text{H}_2\text{O})_2](\text{NO}_3)_2$

**Supplementary Table 9.** Torsion angles for  $[\text{Cd}(\text{DAPO})_2(\text{H}_2\text{O})_2](\text{NO}_3)_2$

**Supplementary Figure 4.** IR Spectrum of DAPO

**Supplementary Figure 5.** IR Spectrum of  $[\text{Co}(\text{DAPO})_2(\text{H}_2\text{O})_2](\text{NO}_3)_2$

**Supplementary Figure 6.** IR Spectrum of  $[\text{Cd}(\text{DAPO})_2(\text{H}_2\text{O})_2](\text{NO}_3)_2$

**Supplementary Figure 7.** <sup>1</sup>H NMR Spectrum of DAPO

**Supplementary Figure 8.** <sup>13</sup>C NMR Spectrum of DAPO

**Supplementary Figure 9.** Mass Spectrum of DAPO

**Energetic properties**

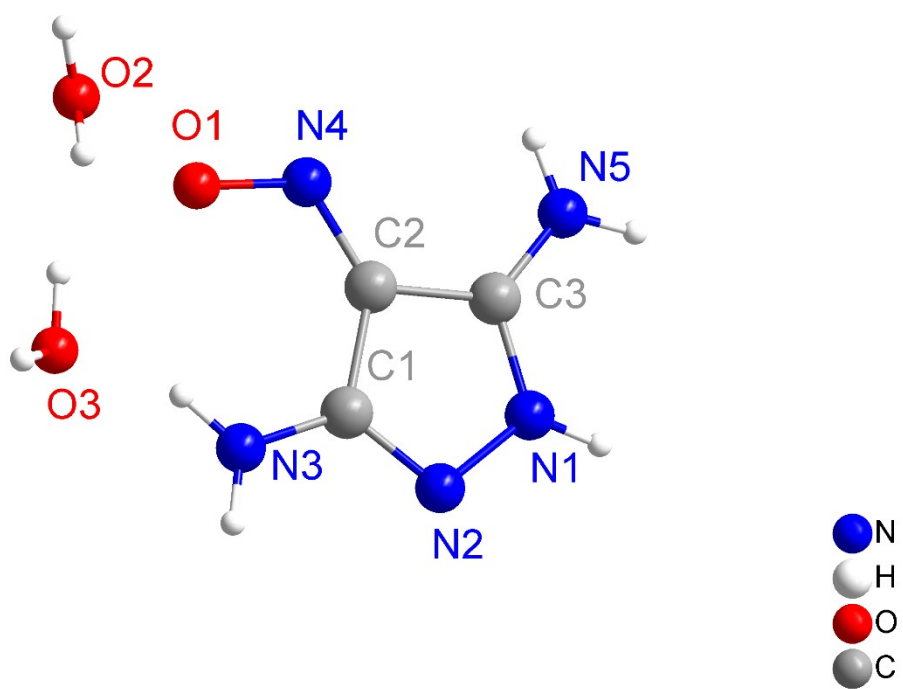

**Supplementary Figure 1.** Single-crystal X-ray structure of DAPO

**Supplementary Table 1. Bond Lengths for DAPO**

| Bond   | Length/Å |
|--------|----------|
| N1-C3  | 1.329(4) |
| N1-N2  | 1.431(3) |
| N1-H1  | 0.86     |
| N2-C1  | 1.310(4) |
| N3-C1  | 1.361(4) |
| N3-H3A | 0.86     |
| N3-H3B | 0.86     |
| N4-O1  | 1.315(3) |
| N4-C2  | 1.323(4) |
| N5-C3  | 1.330(4) |
| N5-H5A | 0.86     |
| N5-H5B | 0.86     |
| O2-H2C | 0.85     |
| O2-H2D | 0.85     |
| O2-H2A | 0.85     |
| O3-H3C | 0.85     |
| O3-H3D | 0.85     |
| O3-H3E | 0.85     |
| C1-C2  | 1.481(4) |
| C2-C3  | 1.463(4) |

**Supplementary Table 2. Bond angles for DAPO**

| Bond        | Angle/°  |
|-------------|----------|
| C3-N1-N2    | 113.9(2) |
| C3-N1-H1    | 123.1    |
| N2-N1-H1    | 123.1    |
| C1-N2-N1    | 105.0(2) |
| C1-N3-H3A   | 120.0    |
| C1-N3-H3B   | 120.0    |
| H3A-N3-H3B  | 120.0    |
| O1-N4-C2    | 116.5(2) |
| C3-N5-H5A   | 120.0    |
| C3-N5-H5B   | 120.0    |
| H5A-N5-H5B  | 120.0    |
| H2C-O2-H2D  | 108.2    |
| H2C-O2--H2A | 109.7    |
| H2D-O2-H2A  | 109.7    |
| H3C-O3-H3D  | 110.3    |
| H3C-O3-H3E  | 108.5    |
| H3D-O3-H3E  | 110.3    |
| N2-C1-N3    | 123.1(3) |
| N2-C1-C2    | 111.8(3) |
| N3-C1-C2    | 125.2(3) |
| N4-C2-C3    | 123.4(3) |
| N4-C2-C1    | 133.2(3) |
| C3-C2-C1    | 103.4(2) |
| N1-C3-N5    | 124.8(3) |
| N1-C3-C2    | 105.9(3) |
| N5-C3-C2    | 129.2(3) |

**Supplementary Table 3.** Torsion angles for DAPO

| Bond        | Torsion angle/° |
|-------------|-----------------|
| C3-N1-N2-C1 | 0.7(3)          |
| N1-N2-C1-N3 | 178.7(3)        |
| N1-N2-C1-C2 | -0.4(3)         |
| O1-N4-C2-C3 | -179.4(3)       |
| O1-N4-C2-C1 | -1.9(5)         |
| N2-C1-C2-N4 | -177.9(3)       |
| N3-C1-C2-N4 | 3.0(6)          |
| N2-C1-C2-C3 | 0.0(4)          |
| N3-C1-C2-C3 | -179.1(3)       |
| N2-N1-C3-N5 | 179.2(3)        |
| N2-N1-C3-C2 | -0.7(3)         |
| N4-C2-C3-N1 | 178.6(3)        |
| C1-C2-C3-N1 | 0.4(3)          |
| N4-C2-C3-N5 | -1.3(5)         |
| C1-C2-C3-N5 | -179.5(3)       |

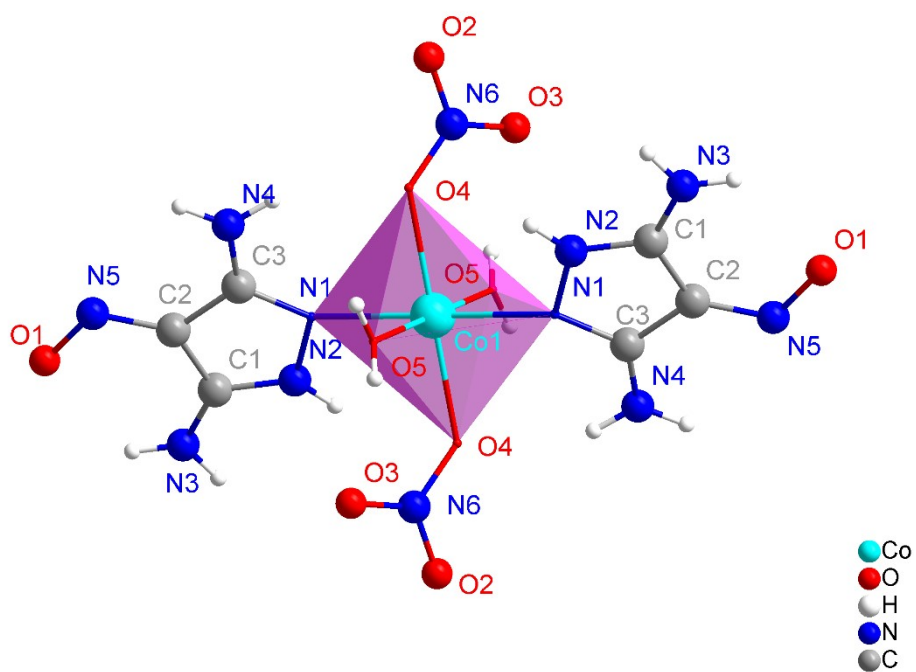

**Supplementary Figure 2.** Single-crystal X-ray structure of  $[\text{Co}(\text{DAPO})_2(\text{H}_2\text{O})_2](\text{NO}_3)_2$

**Supplementary Table 4.** Bond Lengths for [Co(DAPO)<sub>2</sub>(H<sub>2</sub>O)<sub>2</sub>](NO<sub>3</sub>)<sub>2</sub>

| Bond                | Length/Å |
|---------------------|----------|
| Co1-O5 <sup>1</sup> | 2.146(3) |
| Co1-O5              | 2.146(3) |
| Co1-O4 <sup>1</sup> | 2.200(3) |
| Co1-O4              | 2.200(3) |
| Co1-N1 <sup>1</sup> | 2.261(3) |
| Co1-N1              | 2.261(3) |
| O2-N6               | 1.251(4) |
| N6-O3               | 1.234(4) |
| N6-O4               | 1.267(4) |
| N2-N1               | 1.417(4) |
| N2-C1               | 1.324(4) |
| N4-C3               | 1.353(4) |
| N5-O1               | 1.275(4) |
| N5-C2               | 1.345(4) |
| C2-C3               | 1.449(4) |
| C2-C1               | 1.433(4) |
| N1-C3               | 1.317(4) |
| C1-N3               | 1.325(4) |

**Supplementary Table 5.** Bond angles for [Co(DAPO)<sub>2</sub>(H<sub>2</sub>O)<sub>2</sub>](NO<sub>3</sub>)<sub>2</sub>

| Bond                                 | Angle/°   |
|--------------------------------------|-----------|
| O5 <sup>1</sup> -Co1-O5              | 180.0     |
| O5-Co1-O4                            | 97.68(11) |
| O5 <sup>1</sup> -Co1-O4              | 82.32(11) |
| O5-Co1-O4 <sup>1</sup>               | 82.32(11) |
| O5 <sup>1</sup> -Co1-O4 <sup>1</sup> | 97.68(11) |
| O5 <sup>1</sup> -Co1-N1 <sup>1</sup> | 91.38(12) |
| O5 <sup>1</sup> -Co1-N1              | 88.62(12) |
| O5-Co1-N1 <sup>1</sup>               | 88.62(12) |
| O5-Co1-N1                            | 91.38(12) |
| O4 <sup>1</sup> -Co1-O4              | 180.0     |
| O4 <sup>1</sup> -Co1-N1 <sup>1</sup> | 90.83(11) |
| O4 <sup>1</sup> -Co1-N1              | 89.17(11) |
| O4-Co1-N1 <sup>1</sup>               | 89.17(11) |
| O4-Co1-N1                            | 90.83(11) |
| N1 <sup>1</sup> -Co1-N1              | 180.00(8) |
| O2-N6-O4                             | 118.9(3)  |
| O3-N6-O2                             | 120.7(3)  |
| O3-N6-O4                             | 120.4(3)  |
| N6-O4-Co1 <sup>1</sup>               | 129.2(2)  |
| C1-N2-N1                             | 112.7(3)  |
| O1-N5-C2                             | 115.5(4)  |
| N5-C2-C3                             | 125.1(4)  |
| N5-C2-C1                             | 130.3(3)  |
| C1-C2-C3                             | 104.5(3)  |
| N2-N1-Co1 <sup>1</sup>               | 119.4(2)  |
| C3-N1-Co1 <sup>1</sup>               | 131.4(3)  |
| C3-N1-N2                             | 105.4(3)  |
| N4-C3-C2                             | 125.6(4)  |
| N1-C3-N4                             | 123.6(3)  |
| N1-C3-C2                             | 110.8(3)  |
| N2-C1-C2                             | 106.5(3)  |
| N2-C1-N3                             | 124.9(4)  |
| N3-C1-C2                             | 128.6(4)  |



**Supplementary Table 6.** Torsion angles for [Co(DAPO)<sub>2</sub>(H<sub>2</sub>O)<sub>2</sub>](NO<sub>3</sub>)<sub>2</sub>

| Bond         | Torsion angle/° |
|--------------|-----------------|
| Co1-N1-C3-N4 | -21.6(6)        |
| Co1-N1-C3-C2 | 155.9(3)        |
| O2-N6-O4-Co1 | -176.0(2)       |
| O3-N6-O4-Co1 | 4.5(5)          |
| N2-N1-C3-N4  | -179.0(4)       |
| N2-N1-C3-C2  | -1.5(4)         |
| N5-C2-C3-N4  | -2.4(7)         |
| N5-C2-C3-N1  | -179.9(4)       |
| N5-C2-C1-N2  | -179.1(4)       |
| N5-C2-C1-N3  | 0.5(7)          |
| O1-N5-C2-C3  | 178.0(4)        |
| O1-N5-C2-C1  | -3.3(6)         |
| N1-N2-C1-C2  | -0.7(5)         |
| N1-N2-C1-N3  | 179.6(4)        |
| C3-C2-C1-N2  | -0.2(4)         |
| C3-C2-C1-N3  | 179.5(4)        |
| C1-N2-N1-Co1 | -159.2(3)       |
| C1-N2-N1-C3  | 1.4(4)          |
| C1-C2-C3-N4  | 178.6(4)        |
| C1-C2-C3-N1  | 1.1(4)          |

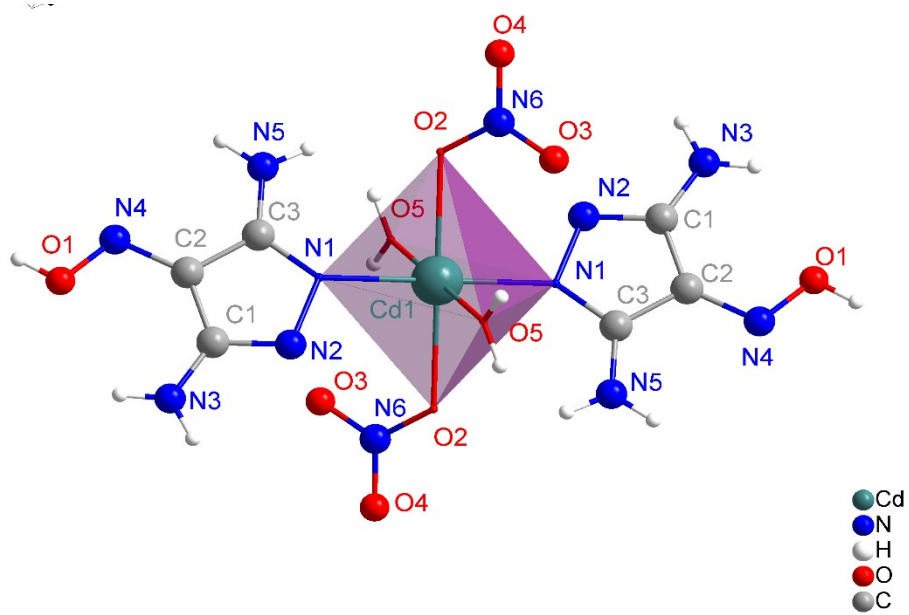

**Supplementary Figure 3.** Single-crystal X-ray structure of  $[\text{Cd}(\text{DAPO})_2(\text{H}_2\text{O})_2](\text{NO}_3)_2$

**Supplementary Table 7.** Bond Lengths for [Cd(DAPO)<sub>2</sub>(H<sub>2</sub>O)<sub>2</sub>](NO<sub>3</sub>)<sub>2</sub>

| Bond         | Length/Å  |
|--------------|-----------|
| Cd(1)-O(5)   | 2.260(4)  |
| Cd(1)-O(5)#1 | 2.260(4)  |
| Cd(1)-N(1)   | 2.291(4)  |
| Cd(1)-N(1)#1 | 2.291(4)  |
| Cd(1)-O(2)#1 | 2.329(4)  |
| Cd(1)-O(2)   | 2.329(4)  |
| N(1)-C(3)    | 1.301(7)  |
| N(1)-N(2)    | 1.419(7)  |
| N(2)-C(1)    | 1.331(8)  |
| N(3)-C(1)    | 1.332(8)  |
| N(3)-H(3A)   | 0.86      |
| N(3)-H(3B)   | 0.86      |
| N(4)-O(1)    | 1.248(7)  |
| N(4)-C(2)    | 1.374(9)  |
| N(5)-C(3)    | 1.330(8)  |
| N(5)-H(5A)   | 0.86      |
| N(5)-H(5B)   | 0.86      |
| N(6)-O(3)    | 1.210(6)  |
| N(6)-O(4)    | 1.236(6)  |
| N(6)-O(2)    | 1.253(6)  |
| O(1)-H(1)    | 0.82      |
| O(5)-H(5E)   | 0.85      |
| O(5)-H(5F)   | 0.85      |
| C(1)-C(2)    | 1.411(10) |
| C(2)-C(3)    | 1.437(8)  |

**Supplementary Table 8.** Bond angles for [Cd(DAPO)<sub>2</sub>(H<sub>2</sub>O)<sub>2</sub>](NO<sub>3</sub>)<sub>2</sub>

| Bond                | Angle/°    |
|---------------------|------------|
| O(5)-Cd(1)-O(5)#1   | 180.00(17) |
| O(5)-Cd(1)-N(1)     | 96.01(17)  |
| O(5)#1-Cd(1)-N(1)   | 83.99(18)  |
| O(5)-Cd(1)-N(1)#1   | 83.99(18)  |
| O(5)#1-Cd(1)-N(1)#1 | 96.01(17)  |
| N(1)-Cd(1)-N(1)#1   | 180        |
| O(5)-Cd(1)-O(2)#1   | 78.56(16)  |
| O(5)#1-Cd(1)-O(2)#1 | 101.44(16) |
| N(1)-Cd(1)-O(2)#1   | 86.46(16)  |
| N(1)#1-Cd(1)-O(2)#1 | 93.54(16)  |
| O(5)-Cd(1)-O(2)     | 101.44(16) |
| O(5)#1-Cd(1)-O(2)   | 78.56(16)  |
| N(1)-Cd(1)-O(2)     | 93.54(16)  |
| N(1)#1-Cd(1)-O(2)   | 86.46(16)  |
| O(2)#1-Cd(1)-O(2)   | 180.000(1) |
| C(3)-N(1)-N(2)      | 106.7(5)   |
| C(3)-N(1)-Cd(1)     | 129.8(4)   |
| N(2)-N(1)-Cd(1)     | 118.3(4)   |
| C(1)-N(2)-N(1)      | 110.2(5)   |
| C(1)-N(3)-H(3A)     | 120        |
| C(1)-N(3)-H(3B)     | 120        |
| H(3A)-N(3)-H(3B)    | 120        |
| O(1)-N(4)-C(2)      | 112.7(6)   |
| C(3)-N(5)-H(5A)     | 120        |
| C(3)-N(5)-H(5B)     | 120        |
| H(5A)-N(5)-H(5B)    | 120        |
| O(3)-N(6)-O(4)      | 120.9(6)   |
| O(3)-N(6)-O(2)      | 120.5(6)   |
| O(4)-N(6)-O(2)      | 118.6(5)   |
| N(4)-O(1)-H(1)      | 109.5      |
| N(6)-O(2)-Cd(1)     | 120.0(4)   |
| Cd(1)-O(5)-H(5E)    | 130.6      |
| Cd(1)-O(5)-H(5F)    | 118.4      |
| H(5E)-O(5)-H(5F)    | 108.3      |
| N(2)-C(1)-N(3)      | 123.2(7)   |
| N(2)-C(1)-C(2)      | 107.9(5)   |

---

|                |          |
|----------------|----------|
| N(3)-C(1)-C(2) | 128.9(6) |
| N(4)-C(2)-C(1) | 133.4(6) |
| N(4)-C(2)-C(3) | 122.2(6) |
| C(1)-C(2)-C(3) | 104.4(5) |
| N(1)-C(3)-N(5) | 123.5(6) |

---

**Supplementary Table 9.** Torsion angles for [Cd(DAPO)<sub>2</sub>(H<sub>2</sub>O)<sub>2</sub>](NO<sub>3</sub>)<sub>2</sub>

| Bond                   | Torsion angle/° |
|------------------------|-----------------|
| O(5)-Cd(1)-N(1)-C(3)   | 28.9(6)         |
| O(5)#1-Cd(1)-N(1)-C(3) | -151.1(6)       |
| N(1)#1-Cd(1)-N(1)-C(3) | -40(100)        |
| O(2)#1-Cd(1)-N(1)-C(3) | -49.2(6)        |
| O(2)-Cd(1)-N(1)-C(3)   | 130.8(6)        |
| O(5)-Cd(1)-N(1)-N(2)   | -122.0(5)       |
| O(5)#1-Cd(1)-N(1)-N(2) | 58.0(5)         |
| N(1)#1-Cd(1)-N(1)-N(2) | 169(100)        |
| O(2)#1-Cd(1)-N(1)-N(2) | 159.9(5)        |
| O(2)-Cd(1)-N(1)-N(2)   | -20.1(5)        |
| C(3)-N(1)-N(2)-C(1)    | -2.3(7)         |
| Cd(1)-N(1)-N(2)-C(1)   | 154.7(5)        |
| O(3)-N(6)-O(2)-Cd(1)   | 0.4(9)          |
| O(4)-N(6)-O(2)-Cd(1)   | 179.1(4)        |
| O(5)-Cd(1)-O(2)-N(6)   | 43.1(4)         |
| O(5)#1-Cd(1)-O(2)-N(6) | -136.9(4)       |
| N(1)-Cd(1)-O(2)-N(6)   | -53.8(4)        |
| N(1)#1-Cd(1)-O(2)-N(6) | 126.2(4)        |
| O(2)#1-Cd(1)-O(2)-N(6) | -44(100)        |
| N(1)-N(2)-C(1)-N(3)    | -178.5(6)       |
| N(1)-N(2)-C(1)-C(2)    | 1.6(8)          |
| O(1)-N(4)-C(2)-C(1)    | 1.2(10)         |
| O(1)-N(4)-C(2)-C(3)    | -179.7(7)       |
| N(2)-C(1)-C(2)-N(4)    | 178.8(7)        |
| N(3)-C(1)-C(2)-N(4)    | -1.1(12)        |
| N(2)-C(1)-C(2)-C(3)    | -0.4(7)         |
| N(3)-C(1)-C(2)-C(3)    | 179.7(6)        |
| N(2)-N(1)-C(3)-N(5)    | -179.3(6)       |
| Cd(1)-N(1)-C(3)-N(5)   | 27.2(9)         |
| N(2)-N(1)-C(3)-C(2)    | 2.1(7)          |
| Cd(1)-N(1)-C(3)-C(2)   | -151.4(4)       |
| N(4)-C(2)-C(3)-N(1)    | 179.6(6)        |
| C(1)-C(2)-C(3)-N(1)    | -1.1(7)         |
| N(4)-C(2)-C(3)-N(5)    | 1.0(10)         |
| C(1)-C(2)-C(3)-N(5)    | -179.7(6)       |

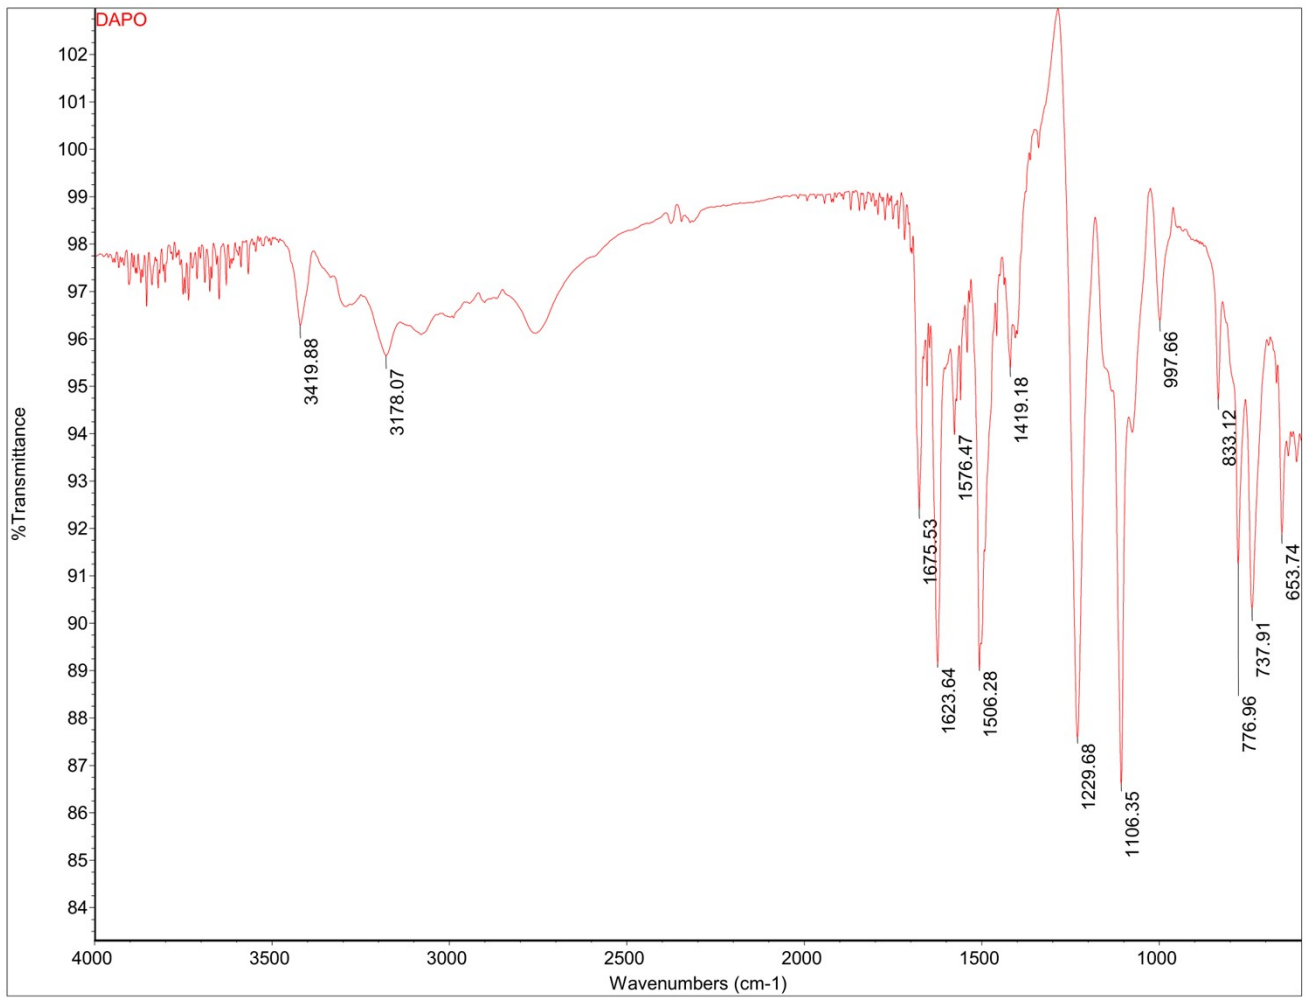

**Supplementary Figure 4. IR Spectrum of DAPO**

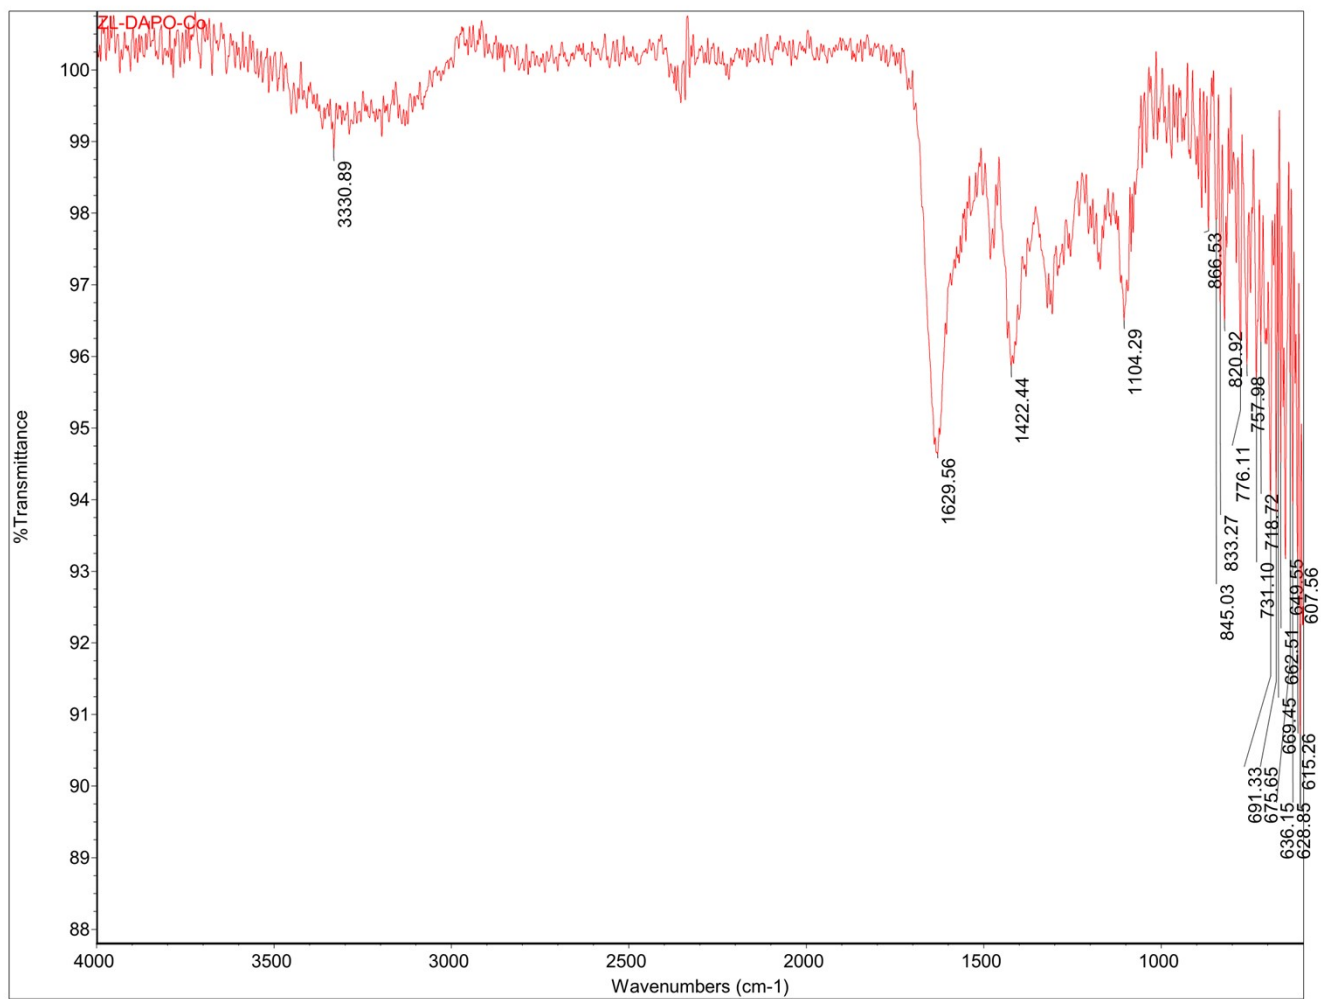

**Supplementary Figure 5.** IR Spectrum of  $[\text{Co}(\text{DAPO})_2(\text{H}_2\text{O})_2](\text{NO}_3)_2$



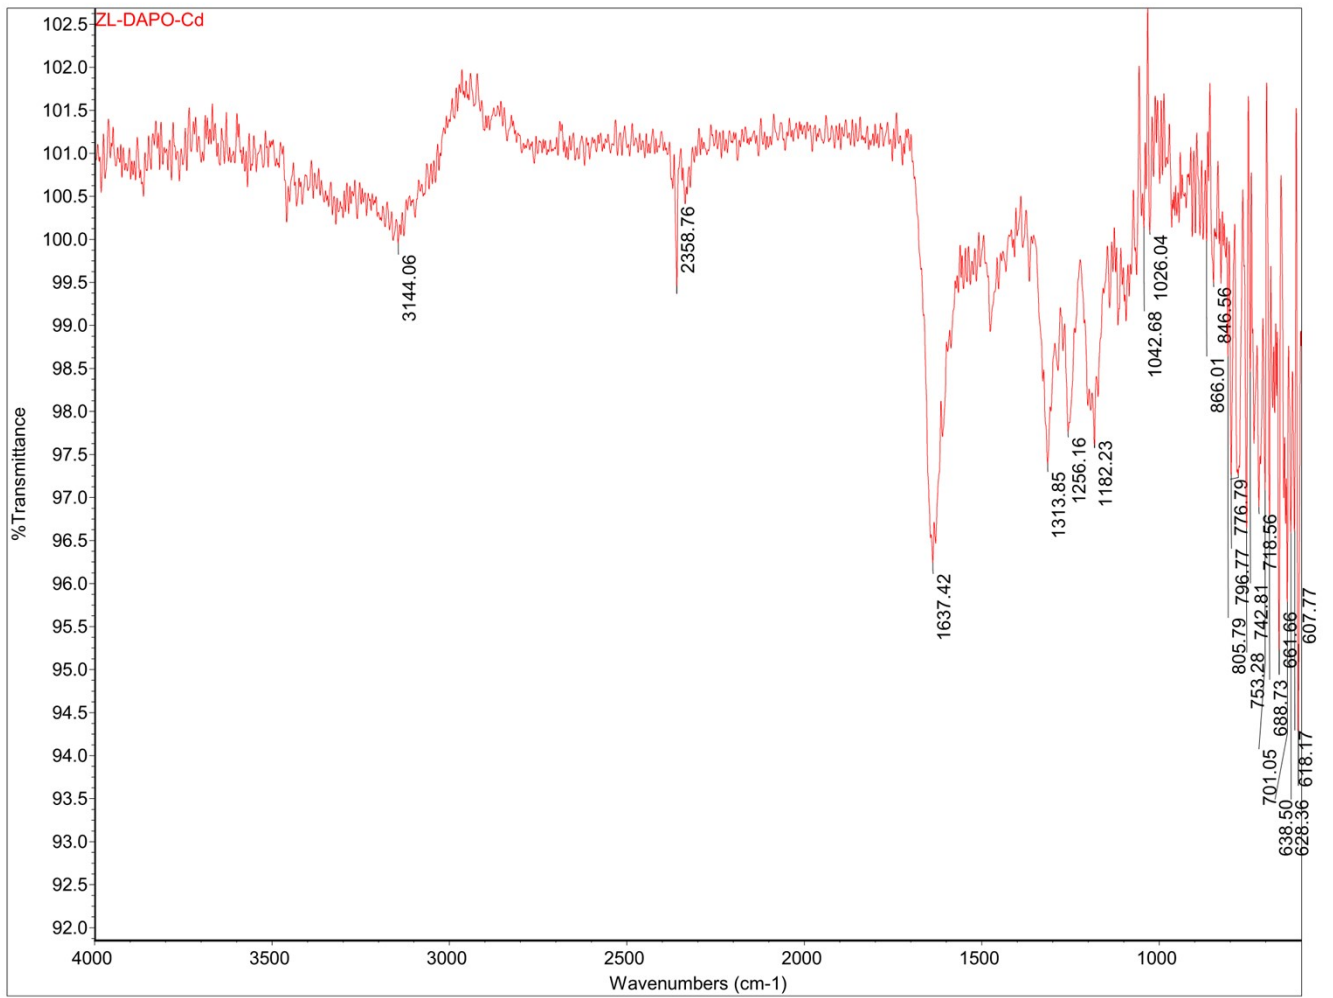

**Supplementary Figure 6.** IR Spectrum of  $[\text{Cd}(\text{DAPO})_2(\text{H}_2\text{O})_2](\text{NO}_3)_2$

DAPO-20220610-HNMR

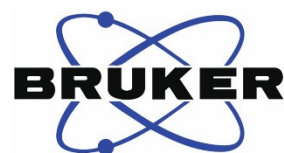

|         |                     |
|---------|---------------------|
| NAME    | DAPO-20220610-HNMR  |
| Date    | 2022-06-10T14:01:43 |
| INSTRUM | Bruker NMR          |
| PROBHD  | 5mm PABBO           |
| EXP     | 1D                  |
| PULPROG | zg30                |
| SOLVENT | DMSO                |
| NS      | 8                   |
| AQ      | 2.04 sec            |
| RG      | 114                 |
| DE      | 6.50 us             |
| TE      | 298.0 K             |
| D1      | 1.00 sec            |
| P1      | 10.00 us            |
| SFO1    | 400.1424709 MHz     |
| NUC1    | <sup>1</sup> H      |
| SWH     | 8013 Hz             |
| LF      | -1536 Hz            |
| SI      | 65536               |
| FIDRES  | 0.12                |

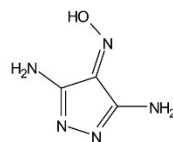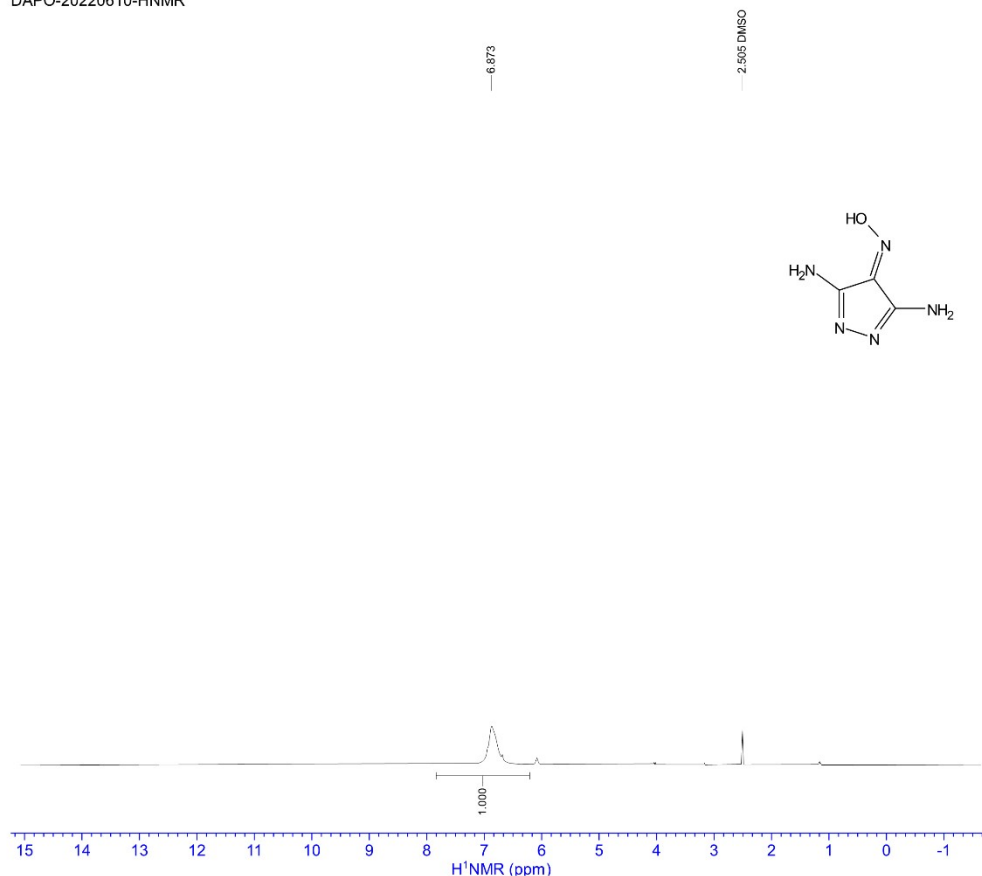

**Supplementary Figure 7.** <sup>1</sup>H NMR Spectrum (400MHz) of DAPO in [D<sub>6</sub>] DMSO at 25 °C

DAPO-20220610-CNMR

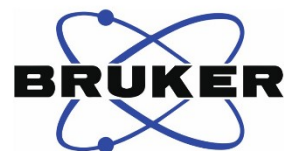

|         |                     |
|---------|---------------------|
| NAME    | DAPO-20220610-CNMR  |
| Date    | 2022-06-11T09:35:11 |
| INSTRUM | Bruker NMR          |
| PROBHD  | 5mm PABBO           |
| EXP     | 1D                  |
| PULPROG | zgpg30              |
| SOLVENT | DMSO                |
| NS      | 1024                |
| AQ      | 1.36 sec            |
| RG      | 203                 |
| DE      | 6.50 us             |
| TE      | 298.1 K             |
| D1      | 2.00 sec            |
| P1      | 12.00 us            |
| SFO1    | 100.6253446 MHz     |
| NUC1    | 13C                 |
| SWH     | 24038 Hz            |
| LF      | -1958 Hz            |
| SI      | 32768               |
| FIDRES  | 0.73                |

154.00  
144.31

40.54 DMSO  
40.33 DMSO  
40.12 DMSO  
39.91 DMSO  
39.70 DMSO  
39.49 DMSO  
39.28 DMSO

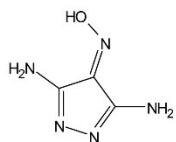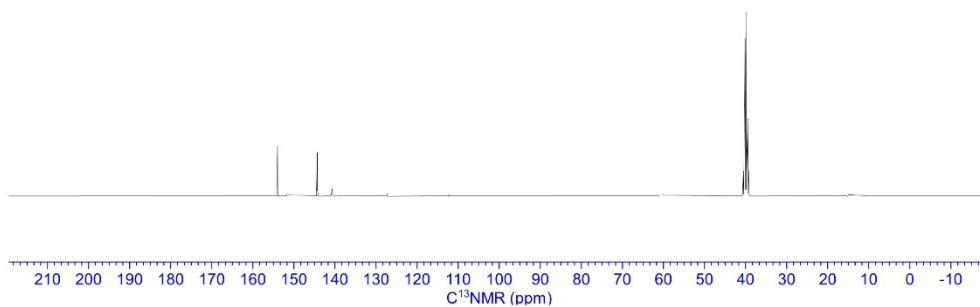

**Supplementary Figure 8.**  $^{13}\text{C}$  NMR Spectrum (100MHz) of DAPO in  $[\text{D}_6]$  DMSO at 25 °C

DAPC #16 RT: 0.09 AV: 1 NL: 5.57E8  
T: FTMS+pESI Full lock.ms [80.0000-1200.0000]  
128.0569

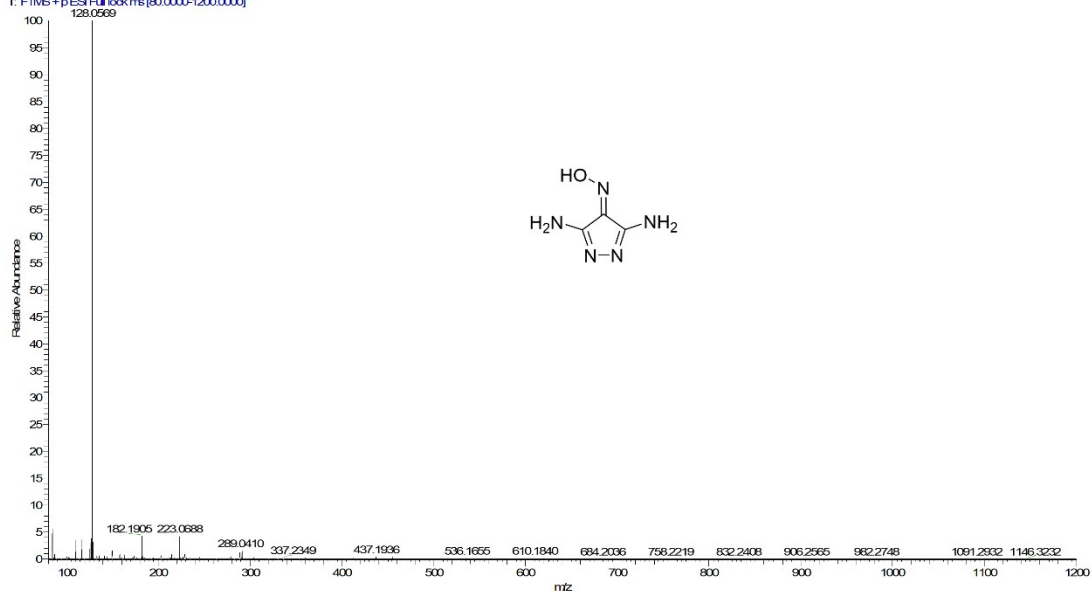

Supplementary Figure 9. Mass Spectrum of DAPO

## Energetic properties

The enthalpy change from the most stable element in the standard state to 1 mol of the compound in the standard state is called the standard enthalpy of formation of the compound. Taking the CHNO system as an example, the corresponding generation reaction formula is as follows:

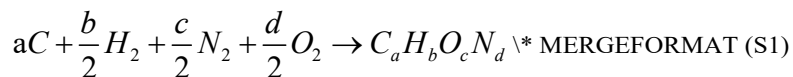

By definition, the enthalpy of formation is the reaction enthalpy of the above formula. The enthalpy of each species in the reaction formula can be calculated by Gaussian09, and the difference between the enthalpy of the product and the enthalpy of the reactant is the reaction enthalpy. Calculated as follows:

$$\Delta_f H_m^\theta = \Delta_r H_m^\theta = H(C_aH_bN_cO_d) - aH(C) - \frac{b}{2}H(H_2) - \frac{c}{2}H(N_2) - \frac{d}{2}H(O_2) \quad \text{\* MERGEFORMAT (S2)}$$

All the above enthalpy values are the enthalpy values of the stable phase at 298 K, so the calculated enthalpy of formation is also the enthalpy of formation at 298 K. It should be noted that C is a solid at room temperature, and the enthalpy calculated by Gaussian09 is the enthalpy of formation in the gaseous state, so  $H(C)$  needs to subtract the sublimation enthalpy of C from the calculation result of Gaussian09, while the other two compounds. The same is true for Co and Cd in .

The enthalpy of formation definition reaction formula of the three compounds synthesized is as follows:

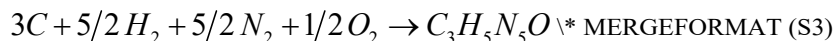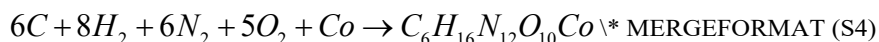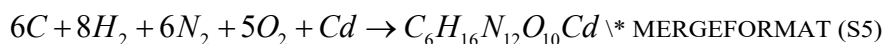

Supplement: d2ce00715k1.pdf [file d2ce00715k1.pdf]
